# Supplementary material
Source: publisher figshare collection journal article supplement (https://acs.figshare.com/ndownloader/files/4753645)
Supplement: Supplementary file 1 [file 4753645]

## **Supporting Information**

### **A Bulk Mixture System of Cyclodextrin and Amine-terminated Polyether: Observation of Reversible Thermo-switching Behavior between Fluid and Gel-like States**

Yukio Isobe, Atsushi Sudo, and Takeshi Endo\*

Molecular Engineering Institute, Kinki University, Kayanomori 11-6, Iizuka, Fukuoka, 820-8555, Japan. E-mail: [tendo@me-henkel.fuk.kindai.ac.jp](mailto:tendo@me-henkel.fuk.kindai.ac.jp)

## Preparation of PPRtx **2a** and its $^1\text{H}$ -NMR analysis

The PPRtx **2a** was prepared in a conventional method. Amine-terminated poly(propylene glycol) **1a** ( $M_n=400$ ; 13.04 g, 32.60 mmol) was added to a saturated aqueous solution of  $\beta$ -CD (18.50 g, 16.30 mmol in 1000 ml  $\text{H}_2\text{O}$ ) at ambient temperature, and the mixture was stirred overnight. The precipitates were collected, washed with small amount of  $\text{H}_2\text{O}$ , and dried under vacuum for 24 h to obtain **2a** as a white solid (10.8 g).  $^1\text{H}$ -NMR spectrum of **2a** in  $\text{DMSO}-d_6$  is shown in Figure S-1. Based on this spectrum, the composition ratio  $[\beta\text{-CD}]/[\mathbf{1a}]$  was calculated to be 2.9.

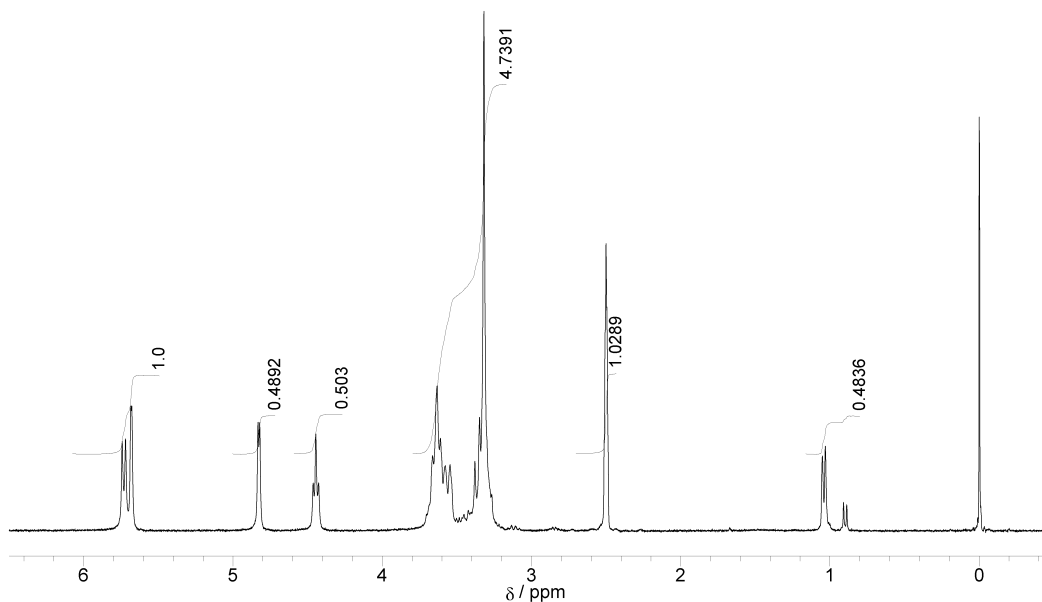

**Figure S-1.**  $^1\text{H}$ -NMR spectrum of the PPRtx **2a** in  $\text{DMSO}-d_6$ .

### Temperature-dependence of the viscosity (for Figure 2)

Changes in viscosity of the mixture of  $\beta$ -CD and polyether ( $[\beta\text{-CD}]/[\text{polyether}]=0.1$ ) on temperature were measured by a BROOKFIELD CAP2000 viscometer (Brookfield Engineering Laboratories, Inc.) with a cap spindle No.1.

### Differential scanning calorimetric (DSC) analysis (for Figure S-2)

DSC was measured on a SEIKO EXSTAR6000 (Seiko Instruments Inc.). The mixture of **1a** and  $\beta$ -CD ( $[\beta\text{-CD}]/[\mathbf{1a}]=0.1$ ) placed into an aluminum pan was heated with a scanning rate of 5 °C/min under a nitrogen atmosphere.

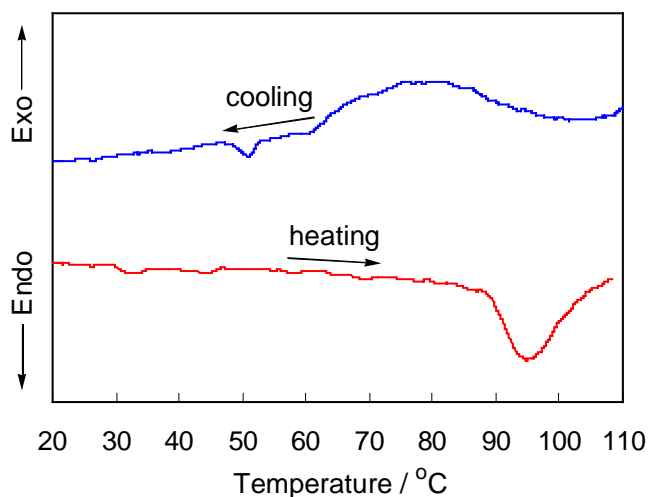

**Figure S-2.** DSC thermograms for the mixture of **1a** with  $\beta$ -CD in the heating and cooling processes
